# Supplementary material for: Thermally activated delayed fluorescence dendrimers achieving 20% external quantum efficiency for solution-processed OLEDs
Source: Royal Society of Chemistry journal article supplement (doi:10.1039/d2qm00833e), 2022-01-01
Supplement: d2qm00833e1.pdf [file d2qm00833e1.pdf]

## Supplementary Information

### Thermally activated delayed fluorescence dendrimers achieving 20% external quantum efficiency for solution-processed OLEDs

Cheng Zhang,<sup>‡a</sup> Hao Yan,<sup>‡b</sup> Yuting He,<sup>‡c</sup> Yongshuai Chai<sup>\*d</sup> and Deyun Zhou<sup>\*c</sup>

<sup>a</sup> Key Laboratory of Functional Textile Material and Product (Ministry of Education), School of Textile Science and Engineering, Xi'an Polytechnic University, Xi'an, Shaanxi, 710048, P. R. China.

<sup>b</sup> School of Advanced Materials, Peking University Shenzhen Graduate School, Peking University, Shenzhen, 518055, P. R. China.

<sup>c</sup> School of Microelectronics, Northwestern Polytechnical University, Xi'an, Shaanxi, 710129, P. R. China. E-mail: dyzhou@nwpu.edu.cn.

<sup>d</sup> Interdisciplinary Research Center on Biology and Chemistry, Shanghai Institute of Organic Chemistry, Chinese Academy of Sciences, Shanghai, 201210, P. R. China. E-mail: Chaiys@sioc.ac.cn.

<sup>‡</sup> Cheng Zhang, Hao Yan and Yuting He contributed equally to this work.

#### Contents

- 1) **Scheme S1.** Synthetic route of the target molecules tBuTCz-DPyM and MeOTCz-DPyM.
- 2) **Fig. S1.** TGA and DSC curves of tBuTCz-DPyM and MeOTCz-DPyM.
- 3) **Fig. S2.** The AFM topographic images of the solution-processed (a) tBuTCz-DPyM, (b) MeOTCz-DPyM films.
- 4) **Fig. S3.** Cyclic voltammograms of tBuTCz-DPyM and MeOTCz-DPyM in CH<sub>2</sub>Cl<sub>2</sub> solution.
- 5) **Table S1.** The data of rate constants of tBuTCz-DPyM and MeOTCz-DPyM.
- 6) **Fig. S4.** <sup>1</sup>H NMR spectrum of tBuTCz-DPyM.
- 7) **Fig. S5.** <sup>13</sup>C NMR spectrum of tBuTCz-DPyM.
- 8) **Fig. S6.** HRMS spectrum of tBuTCz-DPyM.
- 9) **Fig. S7.** <sup>1</sup>H NMR spectrum of MeOTCz-DPyM.
- 10) **Fig. S8.** <sup>13</sup>C NMR spectrum of MeOTCz-DPyM.

11) Fig. S9. HRMS spectrum of MeOTCz-DPyM.

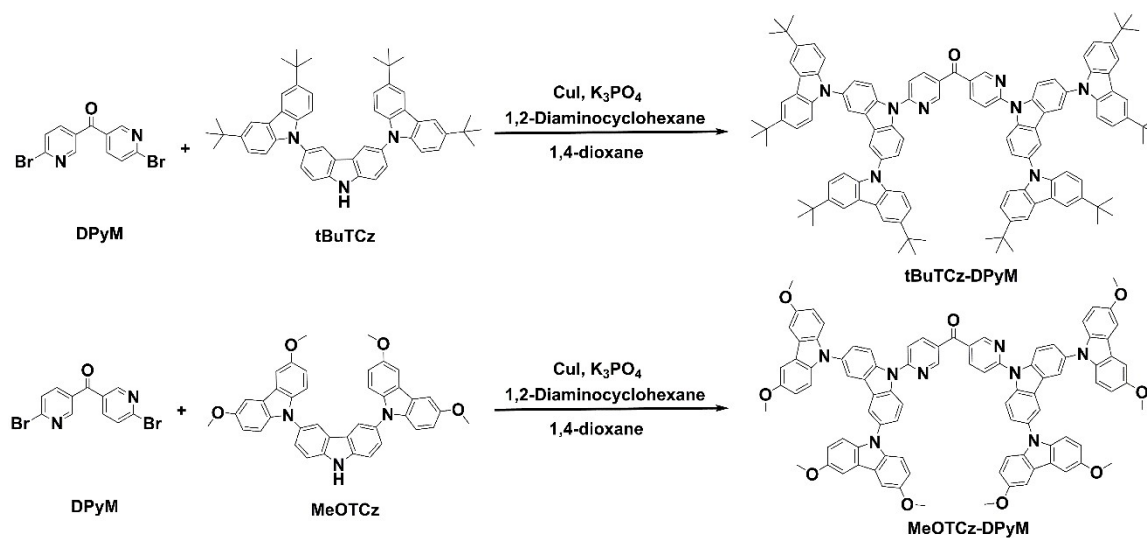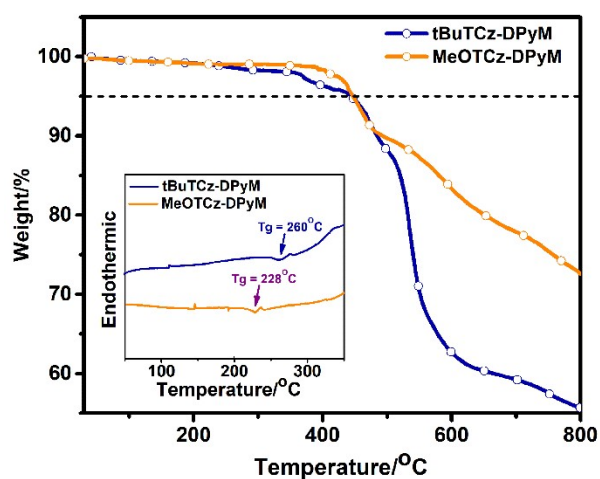

Fig. S1. TGA and DSC curves of tBuTCz-DPyM and MeOTCz-DPyM.

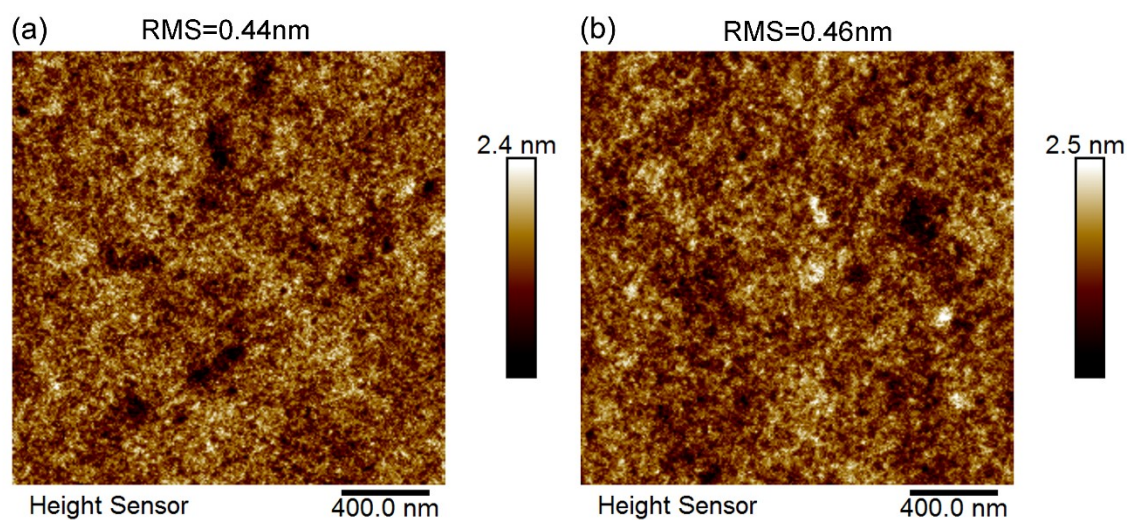

Fig. S2. The AFM topographic images of the solution-processed (a) tBuTCz-DPyM, (b) MeOTCz-

DPyM films.

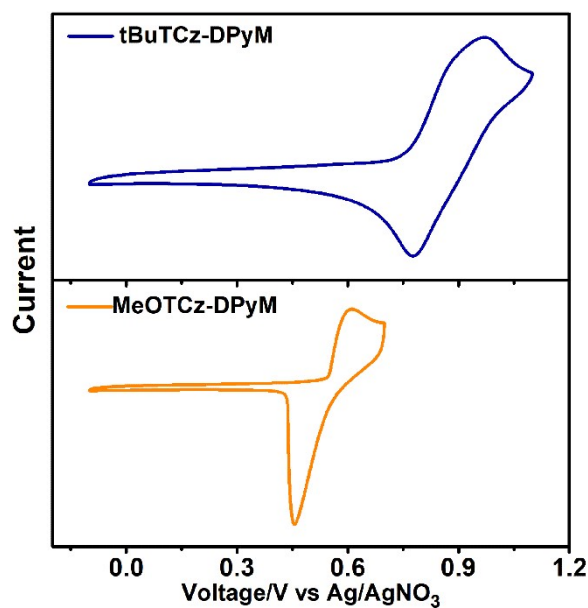

**Fig. S3.** Cyclic voltammograms of tBuTCz-DPyM and MeOTCz-DPyM in  $\text{CH}_2\text{Cl}_2$  solution.

**Table S1.** The data of rate constants of tBuTCz-DPyM and MeOTCz-DPyM

| Compound    | $\Phi_p^a(\%)$ | $\Phi_d^b(\%)$ | $k_p^c(10^8 \text{ s}^{-1})$ | $k_d^d(10^5 \text{ s}^{-1})$ | $k_{rs}^e(10^7 \text{ s}^{-1})$ | $k_{nrs}^f(10^7 \text{ s}^{-1})$ | $k_{RISC}^g(10^5 \text{ s}^{-1})$ |
|-------------|----------------|----------------|------------------------------|------------------------------|---------------------------------|----------------------------------|-----------------------------------|
| tBuTCz-DPyM | 35             | 28.5           | 1.4                          | 1.0                          | 5.0                             | 2.9                              | 1.8                               |
| MeOTCz-DPyM | 30             | 25             | 0.6                          | 1.3                          | 1.9                             | 1.6                              | 2.4                               |

<sup>a</sup> The prompt portion of total PLQY. <sup>b</sup> The delayed portion of total PLQY. <sup>c</sup> The rate constant of the prompt fluorescence decay. <sup>d</sup> The rate constant of the delayed fluorescence decay. <sup>e</sup> The rate constant of radiative decay. <sup>f</sup> The rate constant of non-radiative decay. <sup>g</sup> The rate constant of RISC.

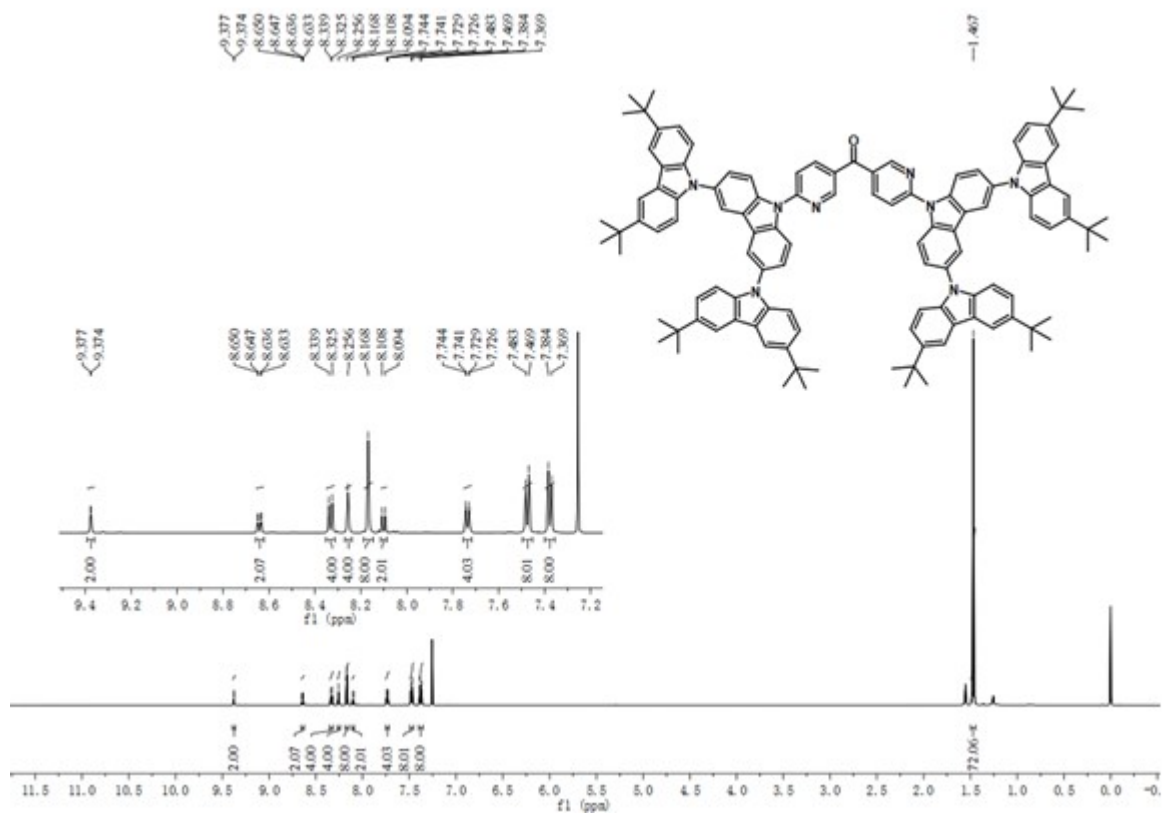

Fig. S4.  $^1\text{H}$  NMR spectrum of tBuTCz-DpyM.

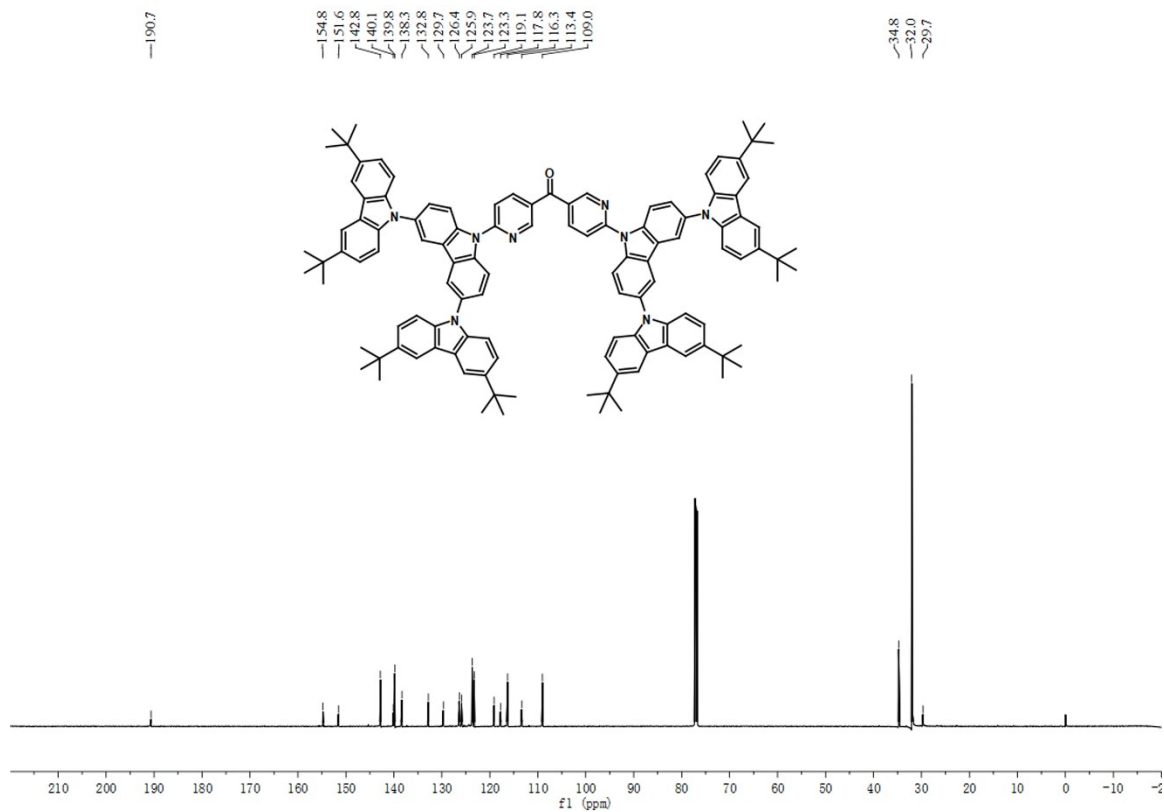

**Fig. S5.**  $^{13}\text{C}$  NMR spectrum of tBuTCz-DPyM.

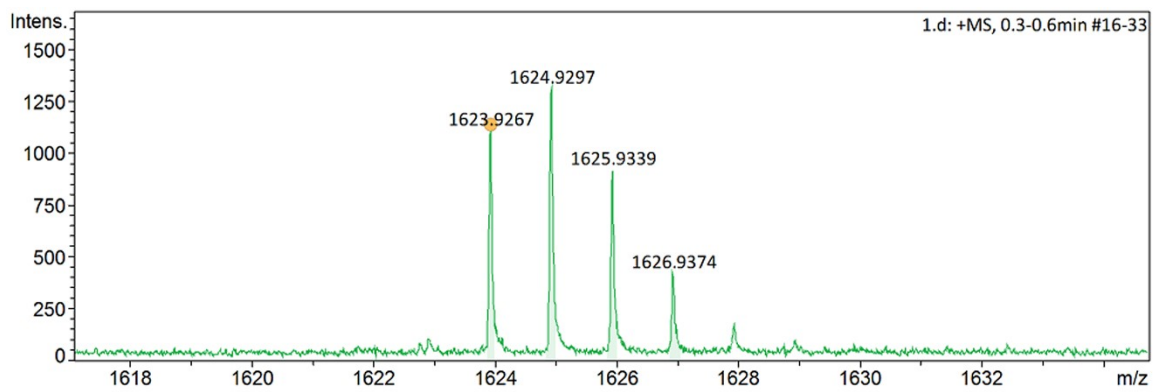

**Fig. S6.** HRMS spectrum of tBuTCz-DPyM.

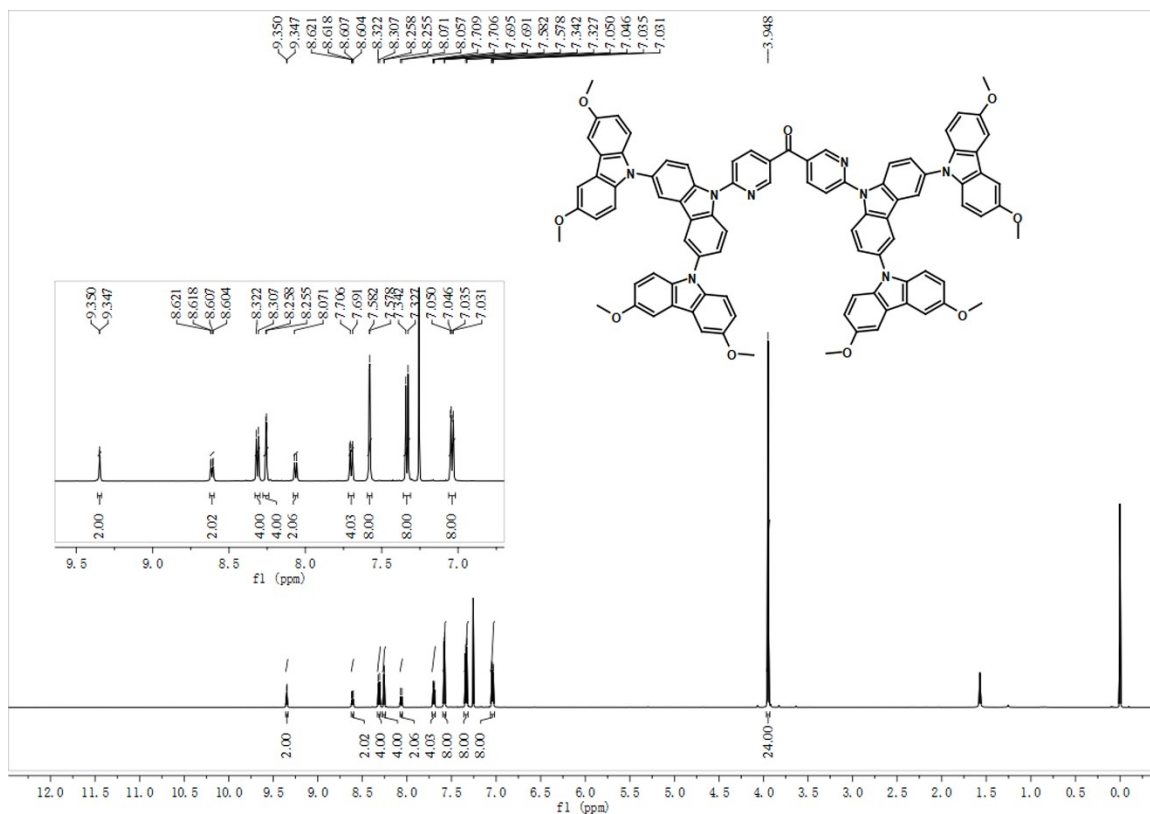

Fig. S7.  $^1\text{H}$  NMR spectrum of MeOTCz-DpyM.

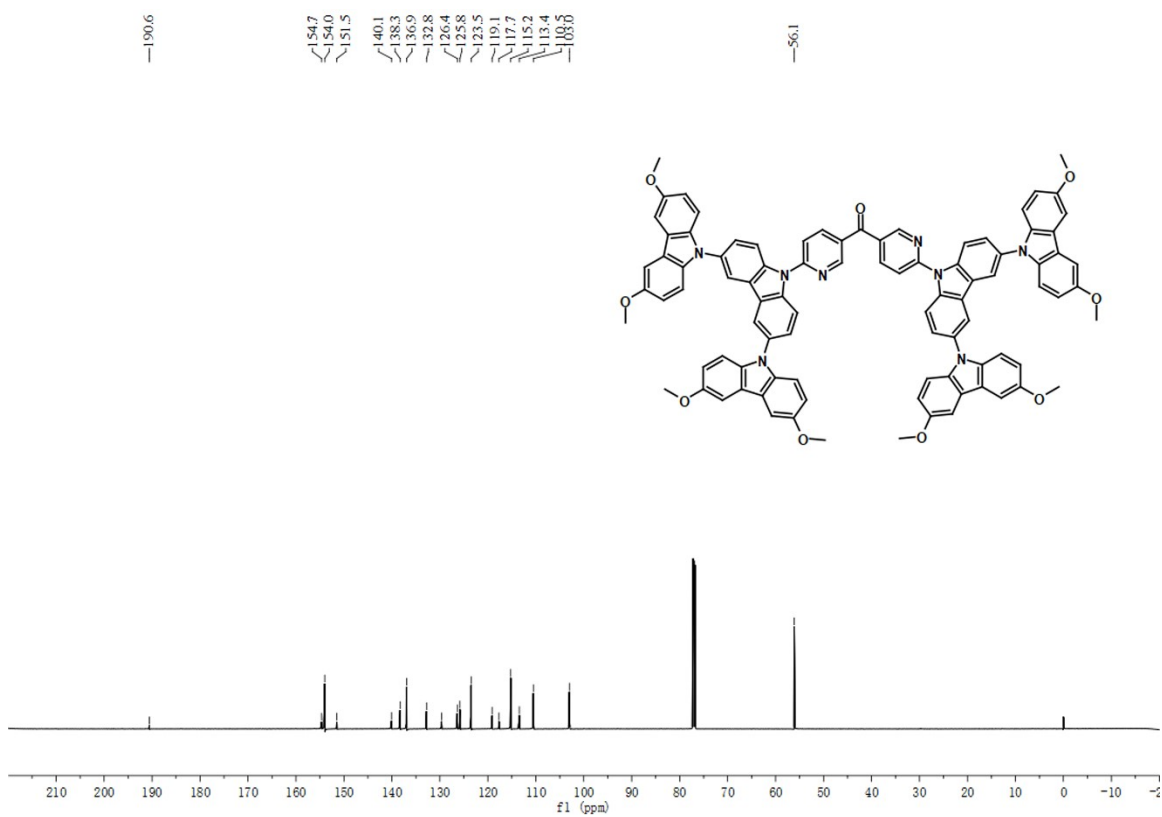

Fig. S8.  $^{13}\text{C}$  NMR spectrum of MeOTCz-DpyM.

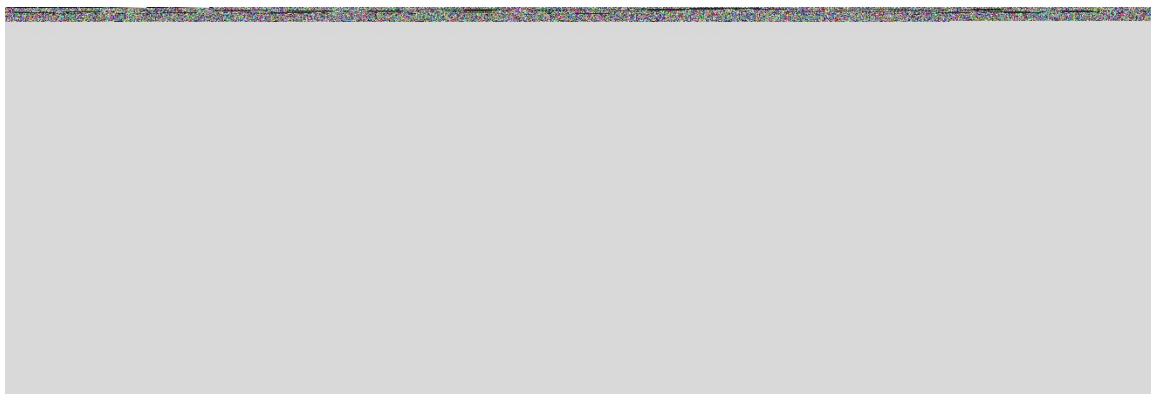

**Fig. S9.** HRMS spectrum of MeOTCz-DPyM.
